# Supplementary material for: Exposure to the Insecticide Sulfoxaflor Affects Behaviour and Biomarkers Responses of Carcinus maenas (Crustacea: Decapoda)
Source: MDPI journal article supplement (doi:10.3390/biology10121234), 2021-11-26
Supplement: s1 [file s1]

## Supplementary Material

### Exposure to the insecticide sulfoxaflor affects behaviour and biomarkers responses of *Carcinus maenas* (Crustacea: Decapoda)

Jadilson M. Damasceno, Lénia D. Rato, Tiago Simões, Inês F. C. Morão, Gabriela Meireles, Sara C. Novais, Marco F.L. Lemos

#### Hydrological parameters assessed every day throughout the experiment

**Table S1.** Hydrological parameters (mean  $\pm$  SD) assessed during acute and chronic tests: temperature; salinity; pH; and DO = dissolved oxygen.

| Water Parameters         | Target parameters | Acute assay      | Chronic assay    |
|--------------------------|-------------------|------------------|------------------|
| Temperature (°C)         | 19                | 19.21 $\pm$ 0.07 | 18.95 $\pm$ 0.04 |
| Salinity (ppt)           | 34                | 33.89 $\pm$ 0.10 | 34.10 $\pm$ 0.01 |
| pH (NBS Scale)           | 7.9 – 8.2         | 7.87 $\pm$ 0.11  | 8.07 $\pm$ 0.08  |
| DO (mg.L <sup>-1</sup> ) | 6 - 8             | 5.67 $\pm$ 0.52  | 6.37 $\pm$ 0.11  |

## Figures, tables and statistical analysis results

**Table S2.** Estimated lethal concentration (LCx) for *Carcinus maenas* after 96h exposure to sulfoxaflor.

| LC level | Concentration (mg.L <sup>-1</sup> ) | 95% Confidence Interval (mg.L <sup>-1</sup> ) |       |
|----------|-------------------------------------|-----------------------------------------------|-------|
|          |                                     | Lower                                         | Upper |
| 0.20     | 4.00                                | 3.09                                          | 7.52  |
| 0.25     | 3.75                                | 2.91                                          | 6.55  |
| 0.30     | 3.53                                | 2.74                                          | 5.81  |
| 0.35     | 3.35                                | 2.59                                          | 5.22  |
| 0.40     | 3.18                                | 2.44                                          | 4.74  |
| 0.45     | 3.02                                | 2.29                                          | 4.34  |
| 0.50     | 2.88                                | 2.14                                          | 4.00  |
| 0.55     | 2.74                                | 1.99                                          | 3.71  |
| 0.60     | 2.61                                | 1.83                                          | 3.46  |
| 0.65     | 2.47                                | 1.68                                          | 3.23  |
| 0.70     | 2.34                                | 1.52                                          | 3.03  |
| 0.75     | 2.21                                | 1.35                                          | 2.85  |
| 0.80     | 2.07                                | 1.18                                          | 2.67  |
| 0.85     | 1.92                                | 1.01                                          | 2.49  |
| 0.90     | 1.74                                | 0.82                                          | 2.30  |

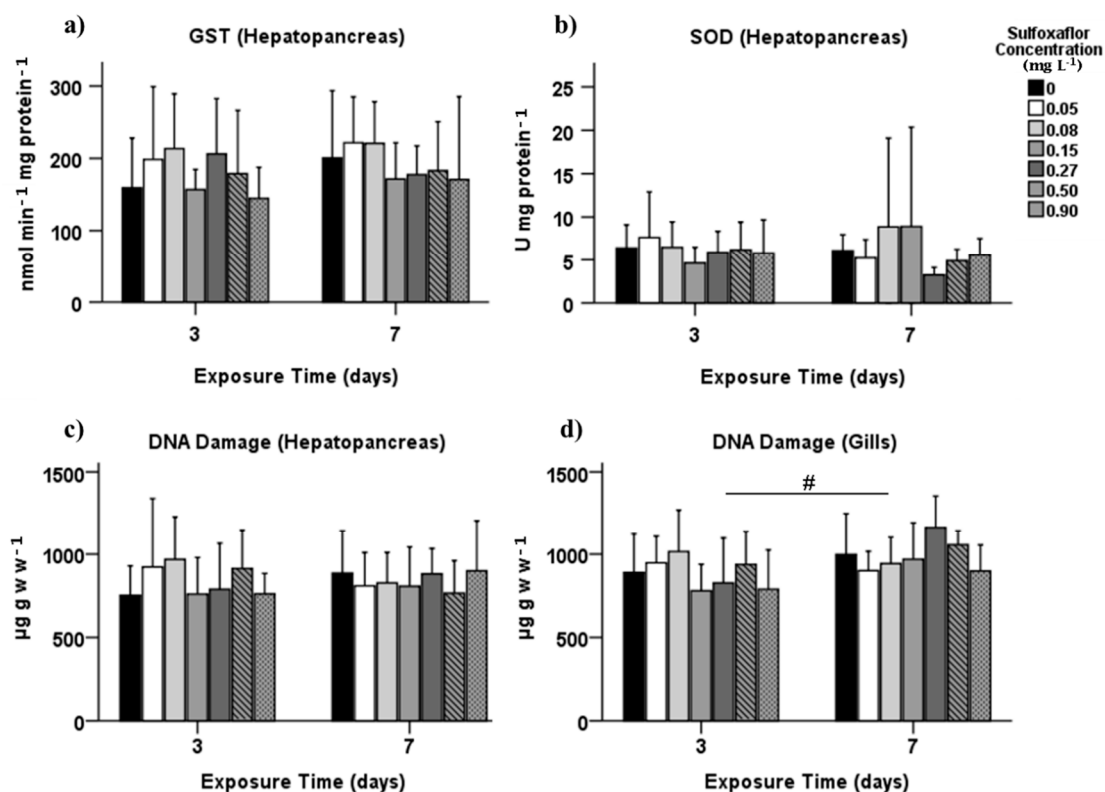

**Figure S1.** Biochemical biomarkers responses measured in hepatopancreas and gills of *Carcinus maenas* after 3 and 7 days of exposure to sulfoxaflores (mean  $\pm$  SD), related to detoxification - a) glutathione S-transferase (GST) measured in hepatopancreas, oxidative stress - b) superoxide dismutase (SOD) and c) DNA damage (DNAd) measured in hepatopancreas; and d) DNAd measured in gills. \* Indicates statistically significant differences in relation to control, and # denotes statistically significant differences between exposure time 3 and 7 days ( $p < 0.05$ , GzLM, followed by pairwise comparison method with adjustment to LSD). Only the biomarkers with no significant differences are shown, compared to control.

**Table S3.** Spearman’s correlation among all biomarkers and behavioural responses. Positive or negative significant correlation are highlighted in bold and with asterisks (\* p-value < .05, \*\* p-value < .01). Time of exposure to sulfoxaflor - T3 = exposure time 3 days; T6 = exposure time 6 days; T7 = exposure time 7 days. Behavioural endpoints assessed - feed intake; motricity. Tissues analysed - (G) = gills; (H) = hepatopancreas; (M) = muscle. Detoxification biomarkers - GST = glutathione S-transferase, oxidative stress - SOD = superoxide dismutase; ROS = reactive oxygen species; DNAd = DNA damage; LPO = lipid peroxidation, energy metabolism - IDH = isocitrate dehydrogenase; LDH = lactate dehydrogenase; ETS = electron transport system, and neuromuscular toxicity- AChE = acetylcholinesterase.

|                      | Feed Intake T3 | Motricity T3 | ROS T3 (G)    | DNAd T3 (G)   | LPO T3 (G)     | GST T3 (H)    | SOD T3 (H)     | DNAd T3 (H)   | LPO T3 (H)    | AChE T3 (M)   | IDH T3 (M)     | LDH T3 (M)    | LDH/IDH Ratio T3 (M) | ETS T3 (M)    | DNAd T3 (M)    | LPO T3 (M) | Feed Intake T6 | Motricity T6 | ROS T7 (G)    | DNAd T7 (G) | LPO T7 (G)    | GST T7 (H)    | SOD T7 (H)     | DNAd T7 (H)  | LPO T7 (H) | AChE T7 (M)  | IDH T7 (M)     | LDH T7 (M)    | LDH/IDH Ratio T7 (M) | ETS T7 (M)    | DNAd T7 (M) | LPO T7 (M) |
|----------------------|----------------|--------------|---------------|---------------|----------------|---------------|----------------|---------------|---------------|---------------|----------------|---------------|----------------------|---------------|----------------|------------|----------------|--------------|---------------|-------------|---------------|---------------|----------------|--------------|------------|--------------|----------------|---------------|----------------------|---------------|-------------|------------|
| Feed Intake T3       |                |              |               |               |                |               |                |               |               |               |                |               |                      |               |                |            |                |              |               |             |               |               |                |              |            |              |                |               |                      |               |             |            |
| Motricity T3         | -0,260         |              |               |               |                |               |                |               |               |               |                |               |                      |               |                |            |                |              |               |             |               |               |                |              |            |              |                |               |                      |               |             |            |
| ROS T3 (G)           | 0,079          | 0,262        |               |               |                |               |                |               |               |               |                |               |                      |               |                |            |                |              |               |             |               |               |                |              |            |              |                |               |                      |               |             |            |
| DNAd T3 (G)          | 0,109          | -0,173       | 0,133         |               |                |               |                |               |               |               |                |               |                      |               |                |            |                |              |               |             |               |               |                |              |            |              |                |               |                      |               |             |            |
| LPO T3 (G)           | 0,242          | 0,066        | <b>,517**</b> | <b>,360*</b>  |                |               |                |               |               |               |                |               |                      |               |                |            |                |              |               |             |               |               |                |              |            |              |                |               |                      |               |             |            |
| GST T3 (H)           | 0,026          | -0,037       | 0,109         | 0,118         | 0,138          |               |                |               |               |               |                |               |                      |               |                |            |                |              |               |             |               |               |                |              |            |              |                |               |                      |               |             |            |
| SOD T3 (H)           | -0,046         | -0,013       | 0,063         | -0,096        | -0,025         | -0,171        |                |               |               |               |                |               |                      |               |                |            |                |              |               |             |               |               |                |              |            |              |                |               |                      |               |             |            |
| DNAd T3 (H)          | -0,057         | -0,185       | -0,008        | <b>,373**</b> | 0,116          | -0,108        | 0,027          |               |               |               |                |               |                      |               |                |            |                |              |               |             |               |               |                |              |            |              |                |               |                      |               |             |            |
| LPO T3 (H)           | 0,057          | 0,175        | 0,137         | -0,004        | <b>,334*</b>   | <b>,378**</b> | <b>-,421**</b> | -0,133        |               |               |                |               |                      |               |                |            |                |              |               |             |               |               |                |              |            |              |                |               |                      |               |             |            |
| AChE T3 (M)          | -0,203         | 0,167        | -0,055        | -0,062        | -0,092         | 0,199         | 0,200          | -0,049        |               |               |                |               |                      |               |                |            |                |              |               |             |               |               |                |              |            |              |                |               |                      |               |             |            |
| IDH T3 (M)           | 0,101          | 0,049        | <b>,329*</b>  | 0,202         | 0,204          | <b>,290*</b>  | -0,272         | -0,025        | <b>,297*</b>  | 0,084         |                |               |                      |               |                |            |                |              |               |             |               |               |                |              |            |              |                |               |                      |               |             |            |
| LDH T3 (M)           | -0,026         | 0,005        | 0,061         | 0,046         | 0,097          | 0,164         | <b>-,418**</b> | 0,073         | <b>,419**</b> | -0,263        | 0,188          |               |                      |               |                |            |                |              |               |             |               |               |                |              |            |              |                |               |                      |               |             |            |
| LDH/IDH Ratio T3 (M) | -0,081         | -0,046       | <b>-,290*</b> | -0,158        | -0,107         | -0,131        | -0,131         | 0,076         | 0,098         | -0,218        | <b>-,670**</b> | <b>,549**</b> |                      |               |                |            |                |              |               |             |               |               |                |              |            |              |                |               |                      |               |             |            |
| ETS T3 (M)           | -0,124         | -0,091       | -0,099        | 0,191         | -0,011         | -0,054        | -0,044         | 0,176         | -0,183        | 0,027         | -0,014         | 0,116         | 0,110                |               |                |            |                |              |               |             |               |               |                |              |            |              |                |               |                      |               |             |            |
| DNAd T3 (M)          | -0,200         | -0,160       | -0,102        | -0,115        | 0,023          | -0,007        | -0,067         | 0,007         | 0,034         | -0,242        | -0,152         | <b>,420**</b> | <b>,478**</b>        | 0,139         |                |            |                |              |               |             |               |               |                |              |            |              |                |               |                      |               |             |            |
| LPO T3 (M)           | 0,261          | 0,111        | 0,155         | -0,214        | 0,245          | -0,040        | 0,158          | -0,172        | 0,067         | -0,001        | -0,097         | -0,217        | -0,075               | -0,180        | 0,075          |            |                |              |               |             |               |               |                |              |            |              |                |               |                      |               |             |            |
| Feed Intake T6       | <b>,353*</b>   | -0,125       | -0,102        | -0,043        | -0,067         | 0,007         | -0,077         | -0,005        | 0,060         | -0,261        | 0,273          | 0,126         | -0,177               | -0,096        | -0,023         | -0,106     |                |              |               |             |               |               |                |              |            |              |                |               |                      |               |             |            |
| Motricity T6         | -0,092         | 0,104        | 0,072         | -0,179        | -0,122         | 0,192         | 0,057          | -0,183        | 0,053         | 0,064         | 0,074          | -0,129        | -0,124               | -0,228        | -0,051         | 0,015      | <b>-,318*</b>  |              |               |             |               |               |                |              |            |              |                |               |                      |               |             |            |
| ROS T7 (G)           | -0,126         | -0,067       | <b>-,329*</b> | -0,263        | <b>-,287*</b>  | <b>-,290*</b> | -0,014         | 0,103         | -0,020        | 0,073         | -0,216         | 0,129         | <b>,327*</b>         | <b>,324*</b>  | <b>,352*</b>   | -0,001     | 0,052          | -0,007       |               |             |               |               |                |              |            |              |                |               |                      |               |             |            |
| DNAd T7 (G)          | -0,048         | 0,131        | 0,100         | 0,086         | 0,088          | 0,015         | 0,024          | 0,235         | -0,024        | 0,060         | -0,031         | -0,047        | 0,015                | 0,211         | 0,023          | -0,014     | -0,083         | 0,107        | 0,053         |             |               |               |                |              |            |              |                |               |                      |               |             |            |
| LPO T7 (G)           | -0,250         | -0,159       | -0,104        | -0,070        | 0,017          | -0,020        | -0,024         | 0,207         | 0,041         | -0,012        | 0,038          | 0,254         | 0,196                | 0,127         | <b>,359*</b>   | -0,064     | -0,096         | 0,151        | <b>,562**</b> | 0,165       |               |               |                |              |            |              |                |               |                      |               |             |            |
| GST T7 (H)           | -0,008         | 0,242        | <b>,294*</b>  | 0,079         | <b>,374**</b>  | -0,106        | 0,097          | -0,031        | 0,036         | -0,002        | 0,234          | -0,112        | <b>-,313*</b>        | -0,048        | -0,144         | 0,048      | 0,051          | -0,141       | -0,212        | -0,170      | <b>-,286*</b> |               |                |              |            |              |                |               |                      |               |             |            |
| SOD T7 (H)           | -0,162         | -0,122       | -0,091        | -0,072        | -0,152         | -0,200        | <b>,294*</b>   | -0,184        | -0,187        | 0,120         | -0,208         | -0,242        | -0,043               | 0,035         | 0,025          | 0,084      | -0,250         | 0,014        | 0,092         | -0,263      | -0,083        | 0,109         |                |              |            |              |                |               |                      |               |             |            |
| DNAd T7 (H)          | 0,209          | -0,062       | 0,063         | 0,047         | 0,133          | 0,256         | -0,025         | -0,188        | 0,008         | -0,073        | -0,060         | -0,054        | 0,038                | -0,126        | 0,046          | 0,067      | -0,094         | 0,154        | <b>-,320*</b> | 0,139       | -0,171        | <b>-,332*</b> | -0,173         |              |            |              |                |               |                      |               |             |            |
| LPO T7 (H)           | 0,081          | 0,153        | 0,047         | -0,002        | 0,028          | 0,048         | -0,261         | 0,121         | 0,184         | 0,106         | 0,179          | -0,012        | -0,133               | -0,001        | <b>-,370**</b> | -0,116     | 0,083          | 0,171        | 0,035         | 0,146       | 0,019         | 0,090         | <b>-,434**</b> | -0,007       |            |              |                |               |                      |               |             |            |
| AChE T7 (M)          | 0,133          | -0,261       | -0,062        | -0,011        | -0,159         | -0,032        | 0,009          | 0,052         | 0,046         | -0,072        | 0,124          | 0,089         | -0,093               | 0,037         | 0,158          | 0,191      | 0,153          | -0,225       | -0,079        | -0,210      | -0,179        | 0,201         | 0,111          | -0,216       |            |              |                |               |                      |               |             |            |
| IDH T7 (M)           | 0,160          | -0,182       | 0,187         | 0,124         | 0,143          | 0,045         | 0,221          | 0,248         | -0,229        | <b>-,290*</b> | 0,083          | -0,041        | -0,159               | -0,054        | 0,024          | 0,088      | 0,137          | 0,009        | -0,166        | 0,124       | 0,079         | 0,016         | -0,097         | 0,164        | 0,080      | 0,175        |                |               |                      |               |             |            |
| LDH T7 (M)           | 0,044          | 0,171        | 0,227         | 0,008         | 0,208          | 0,086         | 0,034          | 0,074         | 0,009         | -0,017        | 0,136          | -0,047        | -0,147               | 0,123         | -0,092         | 0,067      | -0,105         | -0,005       | -0,173        | 0,046       | -0,244        | 0,240         | -0,225         | 0,118        | 0,201      | 0,028        | <b>,425**</b>  |               |                      |               |             |            |
| LDH/IDH Ratio T7 (M) | -0,144         | <b>,327*</b> | 0,106         | -0,111        | 0,138          | -0,024        | -0,213         | -0,142        | 0,265         | 0,167         | -0,065         | 0,123         | 0,171                | 0,093         | -0,016         | 0,051      | -0,251         | 0,086        | -0,020        | -0,141      | -0,198        | 0,167         | -0,115         | -0,130       | -0,038     | -0,034       | <b>-,544**</b> | <b>,345*</b>  |                      |               |             |            |
| ETS T7 (M)           | 0,148          | -0,192       | 0,134         | 0,061         | 0,073          | -0,199        | 0,020          | 0,259         | -0,090        | -0,072        | 0,048          | -0,121        | -0,145               | 0,062         | 0,139          | 0,236      | 0,109          | -0,081       | 0,000         | 0,281       | 0,100         | -0,042        | 0,005          | 0,009        | -0,037     | 0,072        | <b>,579**</b>  | 0,257         | <b>-,352*</b>        |               |             |            |
| DNAd T7 (M)          | -0,116         | 0,167        | 0,101         | 0,009         | 0,176          | 0,024         | 0,050          | 0,091         | -0,156        | 0,025         | -0,039         | -0,171        | -0,123               | <b>,417**</b> | 0,034          | 0,042      | -0,095         | -0,190       | -0,063        | 0,254       | -0,065        | 0,013         | -0,204         | <b>,298*</b> | 0,086      | -0,200       | <b>,289*</b>   | <b>,580**</b> | 0,095                | <b>,368**</b> |             |            |
| LPO T7 (M)           | -0,123         | 0,047        | -0,179        | <b>-,292*</b> | <b>-,406**</b> | 0,020         | 0,001          | <b>-,335*</b> | 0,038         | -0,163        | 0,091          | 0,157         | 0,050                | 0,010         | 0,254          | -0,049     | 0,182          | <b>,324*</b> | 0,188         | -0,176      | 0,189         | -0,279        | 0,138          | -0,001       | -0,008     | <b>,306*</b> | -0,024         | <b>-,307*</b> | -0,217               | -0,079        | -0,173      |            |
